# Supplementary material
Source: publisher figshare collection journal article supplement (https://tandf.figshare.com/ndownloader/files/13182218)
Supplement: Supplementary file 1 [file 13182218]

**Table S1.** The 21 climatic and topographic variables used to make the potential distribution models of three *Cotinis* species of Colombia. Bio1 to Bio19 are bioclimatic variables available in Worldclim 1.4 (Hijmans et al. 2006).

| Code      | Description                                                |
|-----------|------------------------------------------------------------|
| Bio1      | Annual Mean Temperature                                    |
| Bio2      | Mean Diurnal Range (Mean of monthly (max temp - min temp)) |
| Bio3      | Isothermality (BIO2/BIO7) (* 100)                          |
| Bio4      | Temperature Seasonality (standard deviation *100)          |
| Bio5      | Max Temperature of Warmest Month                           |
| Bio6      | Min Temperature of Coldest Month                           |
| Bio7      | Temperature Annual Range (BIO5-BIO6)                       |
| Bio8      | Mean Temperature of Wettest Quarter                        |
| Bio9      | Mean Temperature of Driest Quarter                         |
| Bio10     | Mean Temperature of Warmest Quarter                        |
| Bio11     | Mean Temperature of Coldest Quarter                        |
| Bio12     | Annual Precipitation                                       |
| Bio13     | Precipitation of Wettest Month                             |
| Bio14     | Precipitation of Driest Month                              |
| Bio15     | Precipitation Seasonality (Coefficient of Variation)       |
| Bio16     | Precipitation of Wettest Quarter                           |
| Bio17     | Precipitation of Driest Quarter                            |
| Bio18     | Precipitation of Warmest Quarter                           |
| Bio19     | Precipitation of Coldest Quarter                           |
| Elevation | Meter on level sea                                         |
| Slope     | Degree of slope made from Digital Elevation Model          |
